# Supplementary material
Source: PubMed Central journal article supplement (PMC10266544)
Supplement: NIHMS1837217-supplement-1.pdf [file NIHMS1837217-supplement-1.pdf]

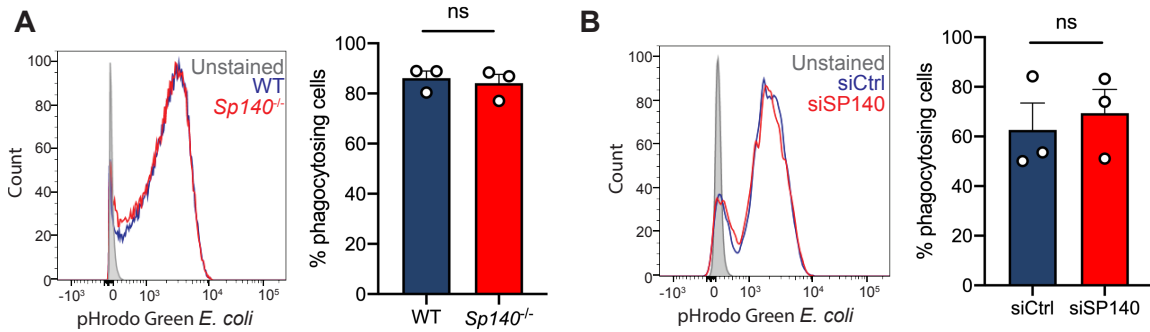

**Figure S1. Unaltered phagocytosis in SP140 deficient macrophages, Related to Figure 1. (A)** Representative histogram overlay of pHrodo Green fluorescence (left) and percentage (right) of phagocytosing mouse bone marrow-derived macrophages (BMDMs) from WT and *Sp140*<sup>-/-</sup> mice. **(B)** Representative histogram overlay of pHrodo Green fluorescence (left) and percentage (right) of phagocytosing THP-1 human monocytes treated with control (Ctrl) or *SP140* targeting siRNAs. Data are mean of three biological replicates, error bars are SEM. ns is not significant; unpaired t-test.

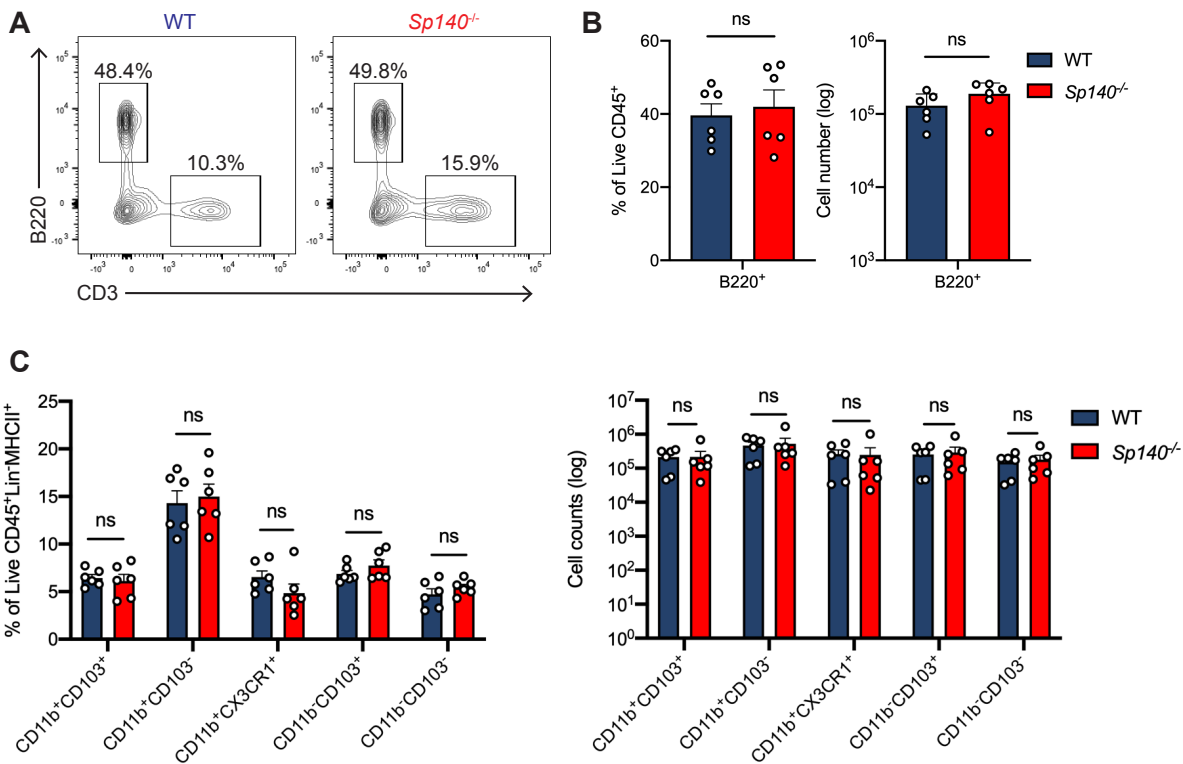

**Figure S2. Characterization of leukocyte populations in WT and *Sp140*<sup>-/-</sup> mouse colon lamina propria at homeostasis, Related to Figure 1. (A)** Representative flow cytometry plots of live CD45<sup>+</sup> cells gated on B220<sup>+</sup> and CD3<sup>+</sup> populations. **(B)** Quantification of frequency and total count of B220<sup>+</sup> B cells. **(C)** Quantification of frequency and total count of mononuclear phagocytes. Data are mean of six biological replicates, error bars are SEM. ns is not significant; unpaired t-test.

**Table S1. Patient metadata including age, remission status, and medication at time of stool collection for healthy control, CD patients expressing wildtype SP140 (SP140<sup>wt</sup>), and CD patients bearing the common SP140 genetic variant (SP140<sup>mut</sup>). Related to Figure 4.**

| <b>Diagnosis</b>                              | <b>PUB ID</b> | <b>Sex</b> | <b>Age at Diagnosis</b> | <b>Age at Collection</b> | <b>In Remission ?</b> | <b>Medication at Time of Collection</b>           |
|-----------------------------------------------|---------------|------------|-------------------------|--------------------------|-----------------------|---------------------------------------------------|
| Healthy Control<br><i>SP140<sup>wt</sup></i>  | 160826        | F          | N/A                     | 46                       | N/A                   | N/A                                               |
|                                               | 120777        | M          | N/A                     | 22                       | N/A                   | N/A                                               |
|                                               | 107560        | F          | N/A                     | 22                       | N/A                   | N/A                                               |
| Crohn's Disease<br><i>SP140<sup>wt</sup></i>  | 109307        | F          | 10                      | 23                       | Yes                   | Remicade                                          |
|                                               | 110577        | F          | 38                      | 38                       | No                    | Mesalamine                                        |
|                                               | 138741        | M          | 21                      | 43                       | Yes                   | Ciprofloxacin, Budesonide, Mercaptopurine, Humira |
| Crohn's Disease<br><i>SP140<sup>mut</sup></i> | 159126        | F          | 46                      | 60                       | No                    | Prednisone, Simponi                               |
|                                               | 184102        | F          | 61                      | 66                       | Yes                   | Prednisone                                        |
|                                               | 160916        | F          | 15                      | 37                       | Yes                   | Cimzia                                            |
